# Supplementary material
Source: PubMed Central journal article supplement (PMC11529422)
Supplement: NIHMS1922483-supplement-Supplemental_Table_2.pdf [file NIHMS1922483-supplement-Supplemental_Table_2.pdf]

**Supplemental Table 2.** Odds of Being Classified as at Least Moderate Progressor (i.e. Moderate or Fast) by Spectral-Domain Optical Coherence Tomography (SD OCT) Versus Standard Automated Perimetry (SAP) According to Diagnostic Group and Visual Field Severity at Baseline.

| <b>Group</b>                        | <b>OR (95% CI)</b>        | <b>P-value*</b>  |
|-------------------------------------|---------------------------|------------------|
| Diagnostic group,<br>GS             | 7.85 (5.79 – 10.63)       | <0.001           |
| POAG                                | 2.54 (2.11 – 3.06)        | <0.001           |
| Other                               | 3.57 (2.86 – 4.45)        | <0.001           |
| SAP severity at baseline,<br>Normal | 10.68 (7.30 – 15.61)      | <0.001           |
| Mild                                | 6.47 (5.34 – 7.84)        | <0.001           |
| Moderate                            | 2.07 (1.59 – 2.69)        | <0.001           |
| Severe                              | 0.78 (0.60 – 1.02)        | 0.055            |
| <b>Overall</b>                      | <b>3.62 (3.20 – 4.10)</b> | <b>&lt;0.001</b> |

\*Generalized estimating equations.

CI = confidence interval; GS = glaucoma suspect; OR = odds ratio; POAG = primary open-angle Glaucoma; SAP = standard automated perimetry.
